# Supplementary material for: PD-1 and PD-L1 Expression Predicts Radiosensitivity and Clinical Outcomes in Head and Neck Cancer and is Associated with HPV Infection
Source: PubMed Central journal article supplement — J Cancer. 2019 Jan 29;10(4):937–48. doi: 10.7150/jca.27199 (PMC6400795; doi:10.7150/jca.27199), 2019-01-29
Supplement: jcav10p0937s1.pdf [file jcav10p0937s1.pdf]

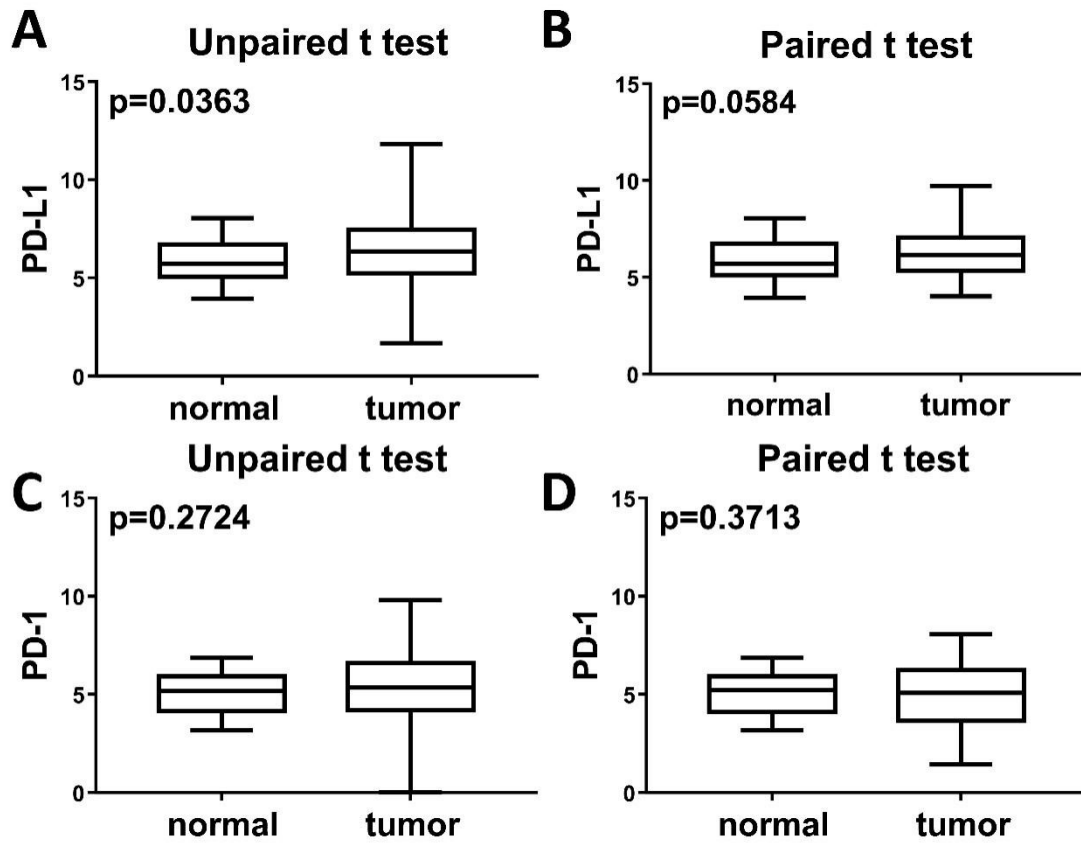

Figure S1. Differences of PD-L1 mRNA expression and PD-1 mRNA expression between head and neck tumors and normal tissues. PD-L1 mRNA expression estimated by unpaired t test (A) and paired t test (B). PD-L1 mRNA expression is upregulated in tumors compared with para-tumor normal tissues. P=0.0363 and P=0.0584, respectively. PD-1 mRNA expression indicated no significant difference between tumors and normal tissues (C-D). P=0.2724 and P=0.3713, respectively.

## Correlation of PD-L1 and PD-1

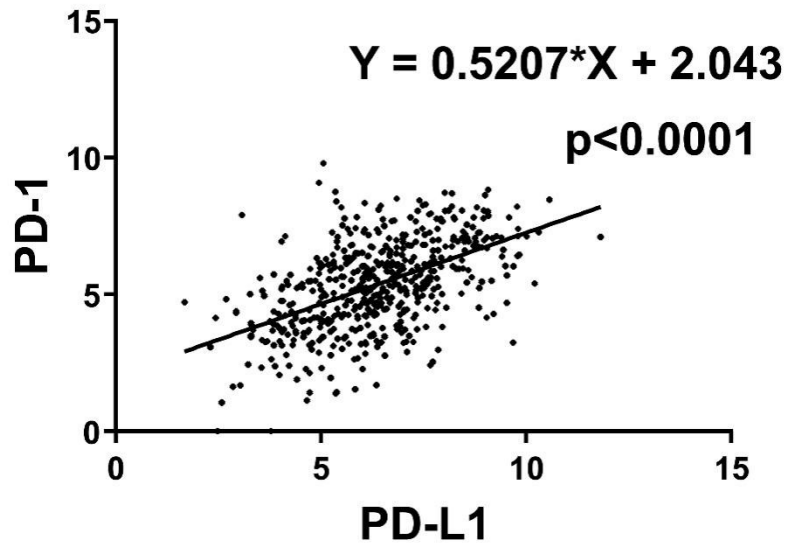

Figure S2. Correlations of PD-L1 mRNA with PD-1 mRNA expression.  $P < 0.0001$ .

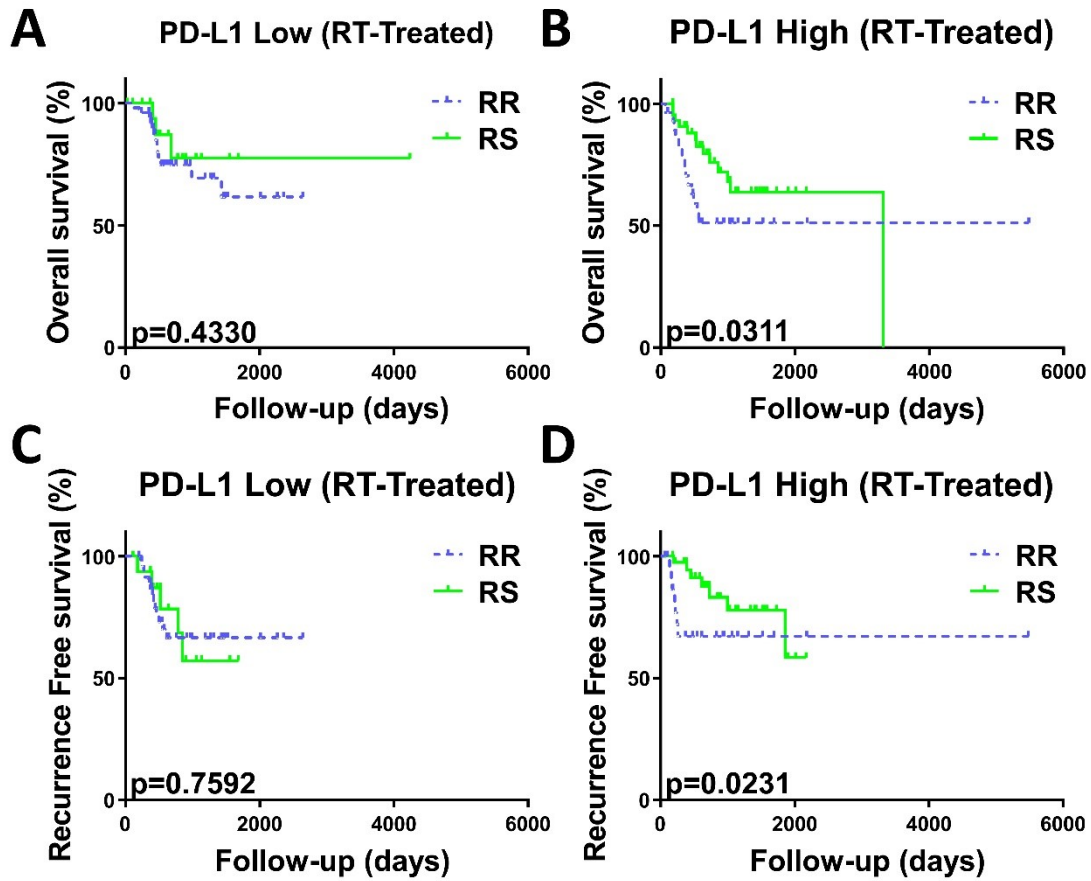

Figure S3. Kaplan-Meier curves analysis stratified by PD-L1 expression level. OS curve (B) and RFS curve (D) indicated worse prognosis of patients with the RR gene signature in the high PD-L1 mRNA group compared with RS. P=0.0311 and 0.0231, respectively. OS curves (A) and RFS curve (C) indicated no significant difference between patients with RR and RS gene signatures in the low PD-L1 mRNA group. P=0.4330 and 0.7592, respectively. P-values calculated using the Gehan-Breslow-Wilcoxon test.

Table S1. Univariate analysis for overall survival (OS) and recurrence-free survival (RFS) according to PD-L1 level

|                  | OS   |            |              |      |            |              |         |            |              | RFS   |            |         |       |            |              |         |            |         |
|------------------|------|------------|--------------|------|------------|--------------|---------|------------|--------------|-------|------------|---------|-------|------------|--------------|---------|------------|---------|
|                  | Low  |            |              | High |            |              | Overall |            |              | Low   |            |         | High  |            |              | Overall |            |         |
|                  | HR   | 95%CI      | P-value      | HR   | 95%CI      | P-value      | HR      | 95%CI      | P-value      | HR    | 95%CI      | P-value | HR    | 95%CI      | P-value      | HR      | 95%CI      | P-value |
| Age              |      |            |              |      |            |              |         |            |              |       |            |         |       |            |              |         |            |         |
| <60              | 1    |            |              | 1    |            |              | 1       |            |              | 1     |            |         | 1     |            |              | 1       |            |         |
| >=60             | 0.95 | 0.35-2.54  | 0.809        | 2.21 | 1.0-4.85   | 0.051        | 1.72    | 0.93-3.14  | 0.083        | 1.28  | 0.51-3.22  | 0.588   | 1.76  | 0.61-5.06  | 0.214        | 1.55    | 0.77-3.09  | 0.161   |
| Margin status    |      |            |              |      |            |              |         |            |              |       |            |         |       |            |              |         |            |         |
| Positive         | 1    |            |              | 1    |            |              | 1       |            |              | 1     |            |         | 1     |            |              | 1       |            |         |
| Negative or      | 0.20 | 0.06-0.71  | <b>0.028</b> | 2.84 | 0.25-32.81 | 0.410        | 0.45    | 0.16-1.27  | 0.228        | 0.37  | 0.11-1.22  | 0.150   | 2.847 | 0.13-60.08 | 0.506        | 0.42    | 0.13-1.30  | 0.263   |
| HPV              |      |            |              |      |            |              |         |            |              |       |            |         |       |            |              |         |            |         |
| Positive         |      |            |              | 1    |            |              | 1       |            |              | 1     |            |         | 1     |            |              | 1       |            |         |
| Negative         | 3.04 | 0.004-2089 | 0.739        | 3.72 | 0.40-34.97 | 0.254        | 3.41    | 0.50-23.21 | 0.2204       | 3.04  | 0.004-2089 | 0.739   | 0.15  | 0.004-4.92 | 0.814        | 1.01    | 0.12-8.78  | 0.523   |
| P16              |      |            |              |      |            |              |         |            |              |       |            |         |       |            |              |         |            |         |
| Positive         |      |            |              | 1    |            |              | 1       |            |              | 1     |            |         | 1     |            |              | 1       |            |         |
| Negative         | 4.01 | 0.16-100.1 | 0.502        | 1.84 | 0.30-11.21 | 0.546        | 2.08    | 0.42-10.17 | 0.435        | 3.269 | 0.13-82.68 | 0.491   | 0.33  | 0.01-7.52  | >0.999       | 1.36    | 0.18-10.19 | 0.433   |
| Stage            |      |            |              |      |            |              |         |            |              |       |            |         |       |            |              |         |            |         |
| I to III         |      |            |              | 1    |            |              | 1       |            |              | 1     |            |         | 1     |            |              | 1       |            |         |
| IV               | 1.15 | 0.27-4.84  | 0.604        | 3.98 | 1.57-10.09 | <b>0.013</b> | 2.53    | 1.17-5.477 | <b>0.031</b> | 2.19  | 0.59-8.10  | 0.308   | 1.39  | 0.45-4.25  | 0.797        | 1.72    | 0.76-3.90  | 0.428   |
| Radiosensitivity |      |            |              |      |            |              |         |            |              |       |            |         |       |            |              |         |            |         |
| RR               | 1    |            |              | 1    |            |              | 1       |            |              | 1     |            |         | 1     |            |              | 1       |            |         |
| RS               | 0.66 | 0.22-2.01  | 0.433        | 0.49 | 0.21-1.10  | <b>0.019</b> | 0.65    | 0.35-1.21  | 0.075        | 1.01  | 0.35-2.83  | 0.759   | 0.44  | 0.14-1.35  | <b>0.023</b> | 0.67    | 0.33-1.33  | 0.057   |
| PD-L1            |      |            |              |      |            |              |         |            |              |       |            |         |       |            |              |         |            |         |
| low              |      |            |              |      |            |              | 1       |            |              |       |            |         |       |            |              | 1       |            |         |
| high             |      |            |              |      |            |              | 1.45    | 0.78-2.67  | 0.177        |       |            |         |       |            |              | 0.78    | 0.39-1.55  | 0.650   |

a. Gehan-Breslow-Wilcoxon tests

Abbreviations: HPV, HPV status assessed by ISH testing; P16, HPV status assessed by p16 testing; RR, radioresistant group; RS, radiosensitive group

Table S2. Univariate analysis for overall survival (OS) and recurrence-free survival (RFS) according to PD-1 level

|                   | OS           |           |                    |      |            |              |         |            |              | RFS   |            |         |      |            |         |         |            |              |
|-------------------|--------------|-----------|--------------------|------|------------|--------------|---------|------------|--------------|-------|------------|---------|------|------------|---------|---------|------------|--------------|
|                   | Low          |           |                    | High |            |              | Overall |            |              | Low   |            |         | High |            |         | Overall |            |              |
|                   | HR           | 95%CI     | P-value            | HR   | 95%CI      | P-value      | HR      | 95%CI      | P-value      | HR    | 95%CI      | P-value | HR   | 95%CI      | P-value | HR      | 95%CI      | P-value      |
| Age               |              |           |                    |      |            |              |         |            |              |       |            |         |      |            |         |         |            |              |
| <60               | 1            |           |                    |      |            |              | 1       |            |              | 1     |            |         |      |            |         |         |            |              |
| >=60              | 1.07         | 0.51-2.25 | 0.982 <sup>a</sup> | 1.71 | 0.68-4.29  | 0.348        | 1.33    | 0.75-2.37  | 0.531        | 0.63  | 0.25-1.55  | 0.424   | 1.33 | 0.38-4.68  | 0.441   | 0.86    | 0.42-1.79  | 0.891        |
| Margin status     |              |           |                    |      |            |              |         |            |              |       |            |         |      |            |         |         |            |              |
| Positive          | 1            |           |                    |      |            |              | 1       |            |              | 1     |            |         |      |            |         |         |            |              |
| Negative or Close | 0.18         | 0.06-0.52 | <b>0.009</b>       | 1.25 | 0.20-7.79  | 0.837        | 0.28    | 0.11-0.71  | <b>0.010</b> | 0.44  | 0.12-1.55  | 0.159   | 3.00 | 0.21-41.51 | 0.442   | 0.51    | 0.15-1.66  | 0.207        |
| HPV               |              |           |                    |      |            |              |         |            |              |       |            |         |      |            |         |         |            |              |
| Positive          | 1            |           |                    |      |            |              | 1       |            |              | 1     |            |         |      |            |         |         |            |              |
| Negative          | <sup>b</sup> | -         | -                  | 5.19 | 0.60-44.53 | 0.131        | 4.05    | 0.73-22.63 | 0.120        | -     | -          | -       | 0.08 | 0.004-1.36 | 0.134   | 0.30    | 0.03- 2.79 | 0.510        |
| P16               |              |           |                    |      |            |              |         |            |              |       |            |         |      |            |         |         |            |              |
| Positive          | 1            |           |                    |      |            |              | 1       |            |              | 1     |            |         |      |            |         |         |            |              |
| Negative          | 0.75         | 0.07-8.03 | 0.554              | 7.89 | 1.07-58.19 | <b>0.042</b> | 3.429   | 0.95-12.32 | 0.099        | 3.308 | 0.21-52.26 | 0.404   | 0.16 | 0.02-1.62  | 0.176   | 1.00    | 0.22-4.50  | 0.489        |
| Stage             |              |           |                    |      |            |              |         |            |              |       |            |         |      |            |         |         |            |              |
| I to III          | 1            |           |                    |      |            |              | 1       |            |              | 1     |            |         |      |            |         |         |            |              |
| IV                | 1.88         | 0.67-5.27 | 0.243              | 2.22 | 0.71-6.90  | 0.117        | 1.99    | 0.95-4.17  | <b>0.041</b> | 2.42  | 0.70-8.39  | 0.127   | 0.64 | 0.13-3.10  | 0.642   | 1.61    | 0.63-4.12  | 0.260        |
| Radiosensitivity  |              |           |                    |      |            |              |         |            |              |       |            |         |      |            |         |         |            |              |
| RR                | 1            |           |                    |      |            |              | 1       |            |              | 1     |            |         |      |            |         |         |            |              |
| RS                | 0.96         | 0.13-6.87 | 0.941              | 0.37 | 0.05-2.70  | 0.229        | 0.66    | 0.37-1.17  | 0.071        | 4.233 | 0.47-37.77 | 0.225   | 2.89 | 0.20-42.58 | 0.472   | 0.68    | 0.33-1.40  | 0.152        |
| PDL1              |              |           |                    |      |            |              |         |            |              |       |            |         |      |            |         |         |            |              |
| low               |              |           |                    |      |            |              | 1       |            |              |       |            |         |      |            |         |         |            |              |
| high              |              |           |                    |      |            |              | 0.68    | 0.38-1.21  | 0.128        |       |            |         |      |            |         | 0.49    | 0.24-1.02  | <b>0.023</b> |

a. Gehan-Breslow-Wilcoxon tests

b. An insufficient number of cases

Abbreviations: HPV, HPV status assessed by ISH testing; P16, HPV status assessed by p16 testing; RR, radioresistant group; RS, radiosensitive group.

Table S3. Cox hazard regression models for overall survival (OS) and recurrence-free survival (RFS) based on PD-L1 and PD-1 levels

|                  |                             | OS    |            |              | RFS  |           |              |
|------------------|-----------------------------|-------|------------|--------------|------|-----------|--------------|
|                  |                             | HR    | 95%CI      | P-value      | HR   | 95%CI     | P-value      |
| PD-L1            |                             |       |            |              |      |           |              |
| PD-L1 Low        |                             |       |            |              |      |           |              |
| Margin status    | Positive(vs.Negative/Close) | 5.89  | 1.92-18.09 | <b>0.002</b> | 2.57 | 0.81-8.17 | 0.11         |
| Radiosensitivity | RR(vs.RS)                   | 4.78  | 0.98-23.39 | 0.053        | 1.3  | 0.39-4.36 | 0.672        |
| PD-L1 High       |                             |       |            |              |      |           |              |
| Stage            | I to IV (Incremental)       | 12.34 | 1.60-94.84 | <b>0.016</b> | 1.39 | 0.65-2.97 | 0.393        |
| Radiosensitivity | RR(vs.RS)                   | 3.68  | 1.43-9.49  | <b>0.007</b> | 2.56 | 0.83-7.91 | 0.102        |
| Overall          |                             |       |            |              |      |           |              |
| Stage            | I to IV (Incremental)       | 3.45  | 1.18-10.14 | <b>0.024</b> | 1.51 | 0.79-2.90 | 0.21         |
| Radiosensitivity | RR(vs.RS)                   | 2.01  | 0.97-4.49  | 0.06         | 1.36 | 0.63-2.91 | 0.429        |
| PD-1             |                             |       |            |              |      |           |              |
| PD-1 Low         |                             |       |            |              |      |           |              |
| Margin status    | Positive(vs.Negative/Close) | 4.23  | 1.76-10.18 | <b>0.001</b> | 1.61 | 0.45-5.82 | 0.464        |
| Radiosensitivity | RR(vs.RS)                   | 2.61  | 0.33-20.77 | 0.365        | 0.55 | 0.09-3.34 | 0.516        |
| Overall          |                             |       |            |              |      |           |              |
| Margin status    | Positive(vs.Negative/Close) | 2.54  | 1.20-5.38  | <b>0.018</b> | 1.28 | 0.42-3.93 | 0.668        |
| Stage            | I to IV (Incremental)       | 1.36  | 0.77-2.40  | 0.293        | 1.08 | 0.57-2.05 | 0.815        |
| PD-1             | High(vs.Low)                | 1.07  | 0.80-1.47  | 0.65         | 0.66 | 0.47-0.93 | <b>0.018</b> |
| Radiosensitivity | RR(vs.RS)                   | 1.86  | 0.51-6.82  | 0.35         | 0.29 | 0.07-1.28 | 0.102        |

Abbreviations: HPV, HPV status assessed by ISH testing; P16, HPV status assessed by p16 testing; RR, radioresistant group; RS, radiosensitive group



Table S4. Recent studies concerning PD-L1 and PD-1 in HNCs

| Author<br>Journal<br>Year                           | DOI                                        | Patient | Tumor<br>Location                                                               | Treatment                                                                                                             | Method                                                               | Correlates for<br>radiosensitivity<br>and HPV | Correlates for prognosis                                                                 |
|-----------------------------------------------------|--------------------------------------------|---------|---------------------------------------------------------------------------------|-----------------------------------------------------------------------------------------------------------------------|----------------------------------------------------------------------|-----------------------------------------------|------------------------------------------------------------------------------------------|
| Fiedler, M.<br>Clin Oral Investig<br>2018           | 10.10<br>07/s0<br>0784-<br>017-2<br>099-x  | 82      | HNSCC                                                                           | 65 patients (79.3%):<br>concurrent<br>chemoradiotherapy (CRT),<br>17 patients (20.7%): RT                             | PD-L1:<br>Immunohistochemistry<br>PD-1+TILs:<br>Immunohistochemistry | High PD-L1<br>indicated<br>radiosensitive     | High PD-1 was correlated with<br>reduced risk for local recurrence                       |
| Muller, T.<br>Oncotarget<br>2017                    | 10.18<br>632/o<br>ncotar<br>get.17<br>547  | 293     | HNSCC                                                                           | Surgery with optional<br>adjuvant<br>radiochemotherapy or<br>definitive<br>radio-chemotherapy with<br>curative intent | PD-L1:<br>Immunohistochemistry                                       |                                               | High PD-L1 was associated with<br>worse overall survival                                 |
| Garcia-Pedrero, J. M.<br>J Am Acad Dermatol<br>2017 | 10.10<br>16/j.ja<br>ad.20<br>17.05.<br>047 | 100     | Cutaneous<br>squamous<br>cell (cSCC)<br>carcinoma<br>of the<br>head and<br>neck | No adjuvant therapy after<br>surgery                                                                                  | PD-L1:<br>Immunohistochemistry                                       |                                               | High PD-L1 predicts increased risk for<br>nodal metastasis                               |
| Lin, Y. M.<br>PLoS One<br>2015                      | 10.13<br>71/jou<br>rnal.p<br>one.0         | 305     | OSCC                                                                            | -                                                                                                                     | PD-L1:<br>Immunohistochemistry                                       |                                               | High PD-L1 was an independent risk<br>factor of overall survival in males and<br>smokers |

|                                                       |                                                   |            |                                                     |                                                                                                                                                                                                                   |                                                                               |                             |                                                                                                                                                                                                           |
|-------------------------------------------------------|---------------------------------------------------|------------|-----------------------------------------------------|-------------------------------------------------------------------------------------------------------------------------------------------------------------------------------------------------------------------|-------------------------------------------------------------------------------|-----------------------------|-----------------------------------------------------------------------------------------------------------------------------------------------------------------------------------------------------------|
|                                                       | 142656                                            |            |                                                     |                                                                                                                                                                                                                   |                                                                               |                             |                                                                                                                                                                                                           |
| Birtalan, E.<br>Appl Immunohistochem Mol Morphol 2017 | 10.10<br>97/pai<br>.0000<br>00000<br>00005<br>90  | 106        | Laryngeal, Oropharyngeal, and Hypopharyngeal Cancer | Surgery: 41.5%;<br>Chemoradiation: 18.9%;<br>Radiation: 19.8%;<br>Induction chemotherapy: 32.1%;<br>Chemotherapy: 0.9%;<br>Chemotherapy plus biological therapy: 3.8%;<br>Radiation plus biological therapy: 0.9% | PD-L1:<br>Immunohistochemistry                                                |                             | High PD-L1 expression on immune cells was associated with better disease-specific survival in HPV-negative tumors and laryngeal tumors.                                                                   |
| Vassilakopoulou, M.<br>Clin Cancer Res 2016           | 10.11<br>58/10<br>78-04<br>32.CC<br>R-15-1<br>543 | 238        | primary laryngeal SCCs                              | Potentially curative resection with or without external beam irradiation                                                                                                                                          | PD-L1: automated quantitative protein analysis (AQUA)                         |                             | High PD-L1 AQUA levels were significantly associated with superior disease-free survival and overall survival                                                                                             |
| Balermipas, P.<br>Int. J. Cancer 2017                 | 10.10<br>02/ijc.<br>30770                         | 161        | oropharynx, hypopharynx or oral cavity              | Surgery and postoperative cisplatin-based CRT                                                                                                                                                                     | PD-L1:<br>Immunohistochemistry<br>PD-1 <sup>+</sup> TILs:Immunohistochemistry |                             | High PD-L1 expression correlated with superior OS, LPFS and DMFS in oropharynx.High PD-1 expression in the intratumoral compartment exhibited a significantly positive correlation with OS,LPFS and DMFS. |
| Kansy, B. A.<br>Cancer Res                            | 10.11<br>58/00                                    | HPV:<br>26 | HNSCC                                               | -                                                                                                                                                                                                                 | PD-1+ TIL: flow cytometry analysis                                            | PD-1 + TIL was increased in | Increased PD-1 high CD8 + TILs correlated with significantly                                                                                                                                              |

|      |                                 |                 |  |  |  |                                                                |                                                                                                                                                                        |
|------|---------------------------------|-----------------|--|--|--|----------------------------------------------------------------|------------------------------------------------------------------------------------------------------------------------------------------------------------------------|
| 2017 | 08-54<br>72.can<br>-16-31<br>67 | CD8 +<br>TIL:56 |  |  |  | HPV-positive patients who experienced better clinical outcome. | worse disease-free survival (DFS) and increased hazard ratio for recurrence, whereas increased PD-1 low T cells was associated with HPV positivity and better outcome. |
|------|---------------------------------|-----------------|--|--|--|----------------------------------------------------------------|------------------------------------------------------------------------------------------------------------------------------------------------------------------------|

Table S5 The 31-genes signature related to radiosensitivity

|        | Downregulated in radioresistant (RR) cells                           | Upregulated in radioresistant (RR) cells                                                                                               |
|--------|----------------------------------------------------------------------|----------------------------------------------------------------------------------------------------------------------------------------|
| Symbol | ARHGDIB, CORO1A, CXCR4, HCLS1, LAPT5, LRMP, MYB, PTPRC, PTPRCAP, WAS | ACTN1, ANXA2, ANXA5, CAPNS1, CBR1, CCND1, CD63, DAG1, EMP2, HTRA1, ITGB5, PFN2, PIR, PKM2, PTMS, PYGB, RAB13, RALB, SCR1, SQSTM1, TWF1 |
